# Supplementary material for: De novo transcript sequence reconstruction from RNA-Seq: reference generation and analysis with Trinity
Source: Springer Nature journal article supplement (doi:10.1038/nprot.2013.084), 2013-07-01
Supplement: 41596_2013_BFnprot2013084_MOESM440_ESM.pdf [file 41596_2013_BFnprot2013084_MOESM440_ESM.pdf]

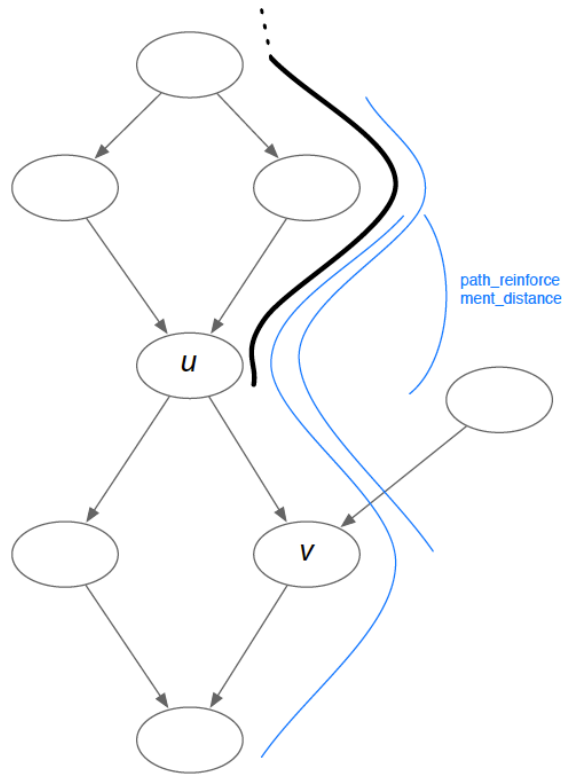

**Butterfly's minimum support requirement for path extension during transcript reconstruction.** To extend a previously constructed path (thick dark black line) that ends at a given node ( $u$ ), there requires minimum read or pair support (shown as thin blue lines) that should be compatible with the path (not traversing nodes that disrupt the existing path), extends to a connecting node ( $v$ ), and exhibits sufficient overlap with the current path. Relevant Butterfly parameters include the minimum read support threshold ('-R', default: 2) and the required path overlap distance ('--path\_reinforcement\_distance', default: 75). In the above example, there are at least two reads that support an extension from node  $u$  to node  $v$ , and extend backward from node  $u$  along the current path overlap, meeting the default required --path\_reinforcement\_distance (default is 75 bases for PE fragments, and 25 bases for SE reads), the extension of path  $\dots u$  to node  $v$ , generating path  $\dots uv$ , would be sufficiently supported. Using strict parameters (high minimal read support and long reinforcement distance) might prevent the extensions of paths resulting in a partially reconstructed transcript, with breaks at insufficient coverage regions. However, using permissive parameters might fuse several distinct transcripts that have assembled together, possible due to overlapping un-translated regions (UTRs).
