# Supplementary material for: De novo transcript sequence reconstruction from RNA-Seq: reference generation and analysis with Trinity
Source: Springer Nature journal article supplement (doi:10.1038/nprot.2013.084), 2013-07-01
Supplement: 41596_2013_BFnprot2013084_MOESM441_ESM.pdf [file 41596_2013_BFnprot2013084_MOESM441_ESM.pdf]

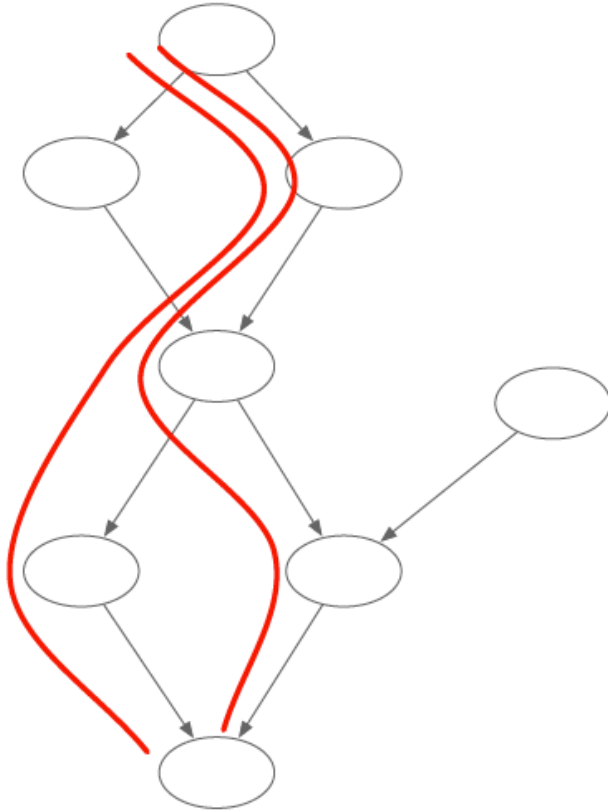

**Merging of insufficiently different path sequences.** Prior to path extension, all existing paths (shown as red lines) that presently terminate at the given node (bottom-most node) are compared in a pairwise fashion. A pair of paths are examined to determine if they are sufficiently different to remain as distinct paths, where sufficiently different is defined by the following parameters: ‘--max\_diffs\_same\_path’ (default: 2), ‘--min\_per\_id\_same\_path’ (default: 95), ‘--max\_internal\_gap\_same\_path’ (default: 10). Paths are defined as too similar if the following logical condition is met: there is no individual insertion or deletion that exceeds the --max\_internal\_gap\_same\_path setting, and either the percent identity of the alignment is at least the --min\_per\_id\_same\_path value or there are fewer nucleotide mismatches encountered than the --max\_diffs\_same\_path value setting. If paths are deemed too similar, then the path with the greater read support is chosen and the lesser-supported path is discarded. If both paths have equivalent read support, then the shorter path is discarded. Using strict parameter assignments will result in a minimal non-redundant set of output assembled sequences, but a more permissive assignment is recommended in order to discover slight variants.
