# Supplementary material for: De novo transcript sequence reconstruction from RNA-Seq: reference generation and analysis with Trinity
Source: Springer Nature journal article supplement (doi:10.1038/nprot.2013.084), 2013-07-01
Supplement: 41596_2013_BFnprot2013084_MOESM443_ESM.pdf [file 41596_2013_BFnprot2013084_MOESM443_ESM.pdf]

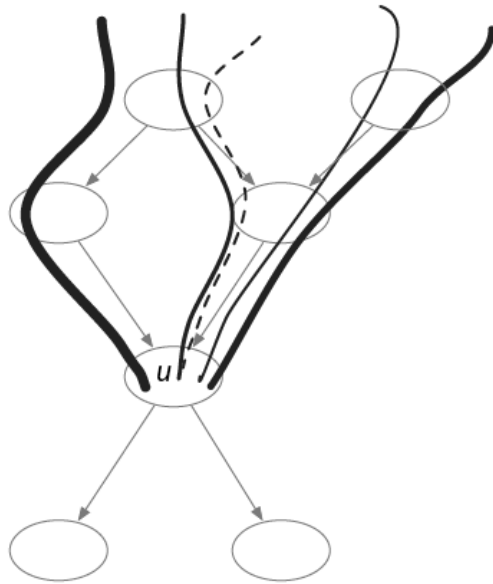

**Restrictions on the number of paths to be extended at each node.** To reduce the potential for combinatorial transcript reconstruction, an upper limit is placed on the number of paths to be extended from a given node ( $u$ ), as defined by Butterfly parameter ‘--max\_number\_of\_paths\_per\_node’. In the present example, only the top number of paths having the greatest read support (relative support indicated by thickness and integrity of path lines) would be candidates for extension from node  $u$  on to nodes below. The remaining nodes would be terminated at node  $u$  and reported accordingly. Using a low *max\_number\_of\_paths\_per\_node* parameter will result in a much faster run of butterfly, reporting a minimal non-redundant set of transcripts.
