# Supplementary material for: De novo transcript sequence reconstruction from RNA-Seq: reference generation and analysis with Trinity
Source: Springer Nature journal article supplement (doi:10.1038/nprot.2013.084), 2013-07-01
Supplement: 41596_2013_BFnprot2013084_MOESM447_ESM.pdf [file 41596_2013_BFnprot2013084_MOESM447_ESM.pdf]

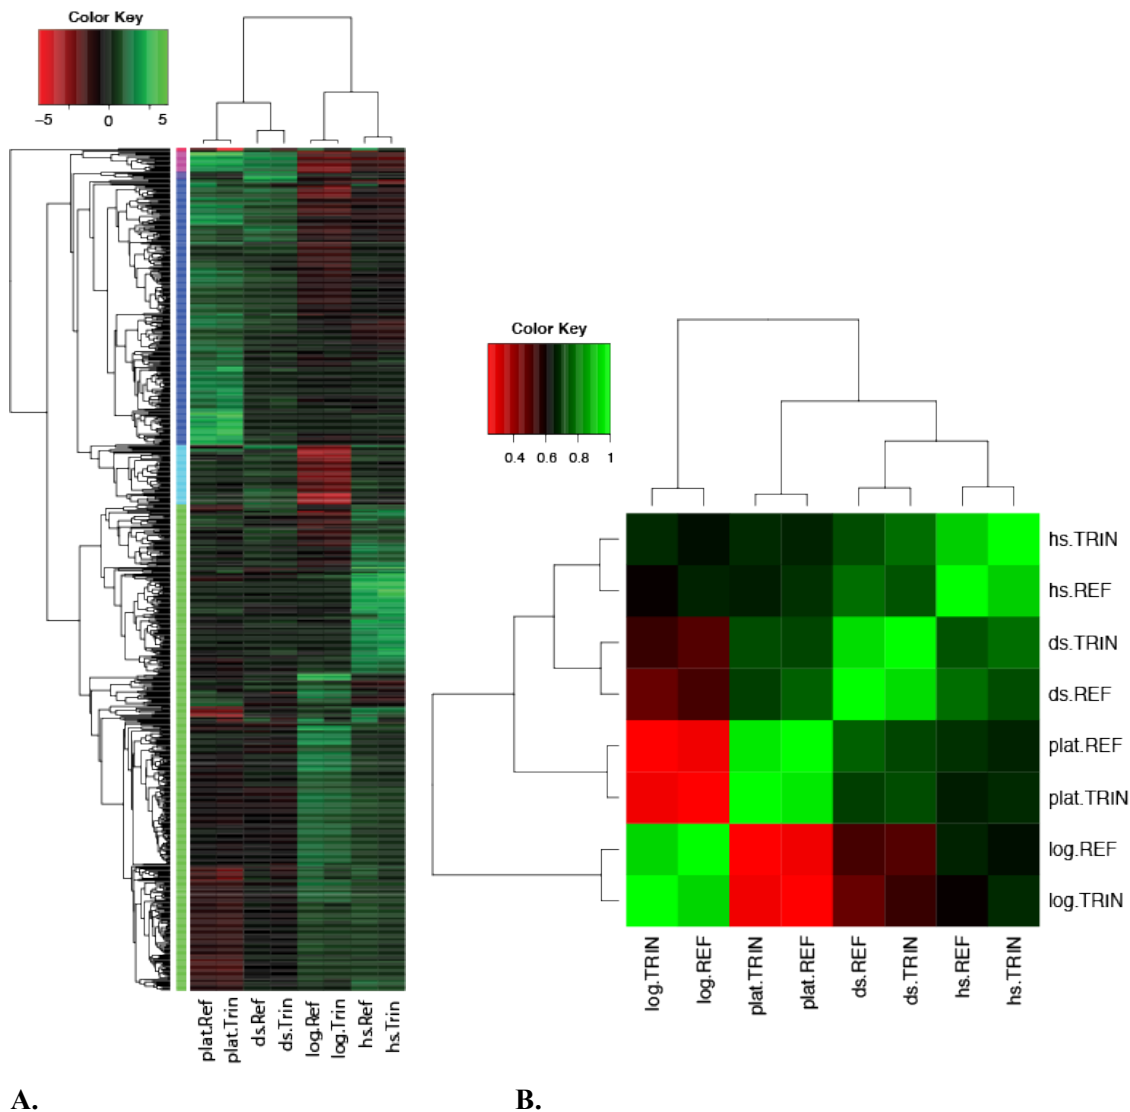

**Agreement between expression profiles calculated based on reference transcripts and trinity components at different *S. pombe* samples.** (a) A heatmap showing the expression profiles for the 430 transcripts (rows) that were differentially expressed between the samples (columns) based on reference transcripts (Ref) and reciprocally-best-matched Trinity components (Trin). Genes and samples are clustered. (b) Gene expression correlation matrix between the expression profiles of each pair of samples calculated based on the reference transcripts (REF) or the matching Trinity components (TRIN).
